# Supplementary material for: Identification of Immune-Related Subtypes and Construction of a Novel Prognostic Model for Bladder Urothelial Cancer
Source: MDPI journal article supplement (doi:10.3390/biom12111670), 2022-11-11
Supplement: s1 [file s1]

**Table S1 :**

The co-expression relationships between PIGs and DETFs

| PIGs    | DETFs  | cor      | <i>p</i> -value | FDR    |
|---------|--------|----------|-----------------|--------|
| CTSS    | IKZF1  | 0.454968 | <0.001          | <0.001 |
| CTSS    | FOXP3  | 0.488266 | <0.001          | <0.001 |
| CTSS    | IRF1   | 0.536781 | <0.001          | <0.001 |
| CTSS    | CIITA  | 0.493997 | <0.001          | <0.001 |
| CTSS    | STAT1  | 0.544606 | <0.001          | <0.001 |
| CTSS    | FLI1   | 0.418201 | <0.001          | <0.001 |
| PDGFRB  | NFATC1 | 0.457551 | <0.001          | <0.001 |
| PDGFRB  | ETS1   | 0.404492 | <0.001          | <0.001 |
| PDGFRB  | GATA6  | 0.446763 | <0.001          | <0.001 |
| PDGFRB  | ERG    | 0.454894 | <0.001          | <0.001 |
| PDGFRB  | FLI1   | 0.446423 | <0.001          | <0.001 |
| PDGFRB  | WWTR1  | 0.528426 | <0.001          | <0.001 |
| PDGFRB  | MITF   | 0.452607 | <0.001          | <0.001 |
| PDGFC   | MAF    | 0.448408 | <0.001          | <0.001 |
| PDGFC   | NR3C1  | 0.457348 | <0.001          | <0.001 |
| PDGFC   | WWTR1  | 0.585299 | <0.001          | <0.001 |
| PDGFC   | MITF   | 0.426719 | <0.001          | <0.001 |
| TNC     | SNAI2  | 0.460336 | <0.001          | <0.001 |
| TNC     | TEAD4  | 0.411191 | <0.001          | <0.001 |
| EDNRA   | ETS1   | 0.423822 | <0.001          | <0.001 |
| EDNRA   | GATA6  | 0.479072 | <0.001          | <0.001 |
| EDNRA   | ERG    | 0.482777 | <0.001          | <0.001 |
| EDNRA   | FLI1   | 0.414418 | <0.001          | <0.001 |
| EDNRA   | WWTR1  | 0.587373 | <0.001          | <0.001 |
| EDNRA   | MITF   | 0.428804 | <0.001          | <0.001 |
| NRP2    | GATA6  | 0.513843 | <0.001          | <0.001 |
| NRP2    | ERG    | 0.400806 | <0.001          | <0.001 |
| NRP2    | GATA3  | -0.40846 | <0.001          | <0.001 |
| NRP2    | WWTR1  | 0.603609 | <0.001          | <0.001 |
| NRP2    | FOXA1  | -0.40036 | <0.001          | <0.001 |
| NRP2    | MITF   | 0.441295 | <0.001          | <0.001 |
| PDGFRA  | SOX17  | 0.445718 | <0.001          | <0.001 |
| PDGFRA  | FLI1   | 0.425145 | <0.001          | <0.001 |
| PDGFRA  | WWTR1  | 0.497123 | <0.001          | <0.001 |
| PDGFRA  | MEF2C  | 0.470663 | <0.001          | <0.001 |
| TGFB3   | MYH11  | 0.426813 | <0.001          | <0.001 |
| TGFB3   | GATA6  | 0.579091 | <0.001          | <0.001 |
| TGFB3   | ERG    | 0.432887 | <0.001          | <0.001 |
| TGFB3   | WWTR1  | 0.596307 | <0.001          | <0.001 |
| TGFB3   | MITF   | 0.495075 | <0.001          | <0.001 |
| S100A10 | CEBPB  | 0.411628 | <0.001          | <0.001 |

|         |       |          |        |        |
|---------|-------|----------|--------|--------|
| S100A10 | TEAD4 | 0.410409 | <0.001 | <0.001 |
| S100A10 | GATA3 | -0.40032 | <0.001 | <0.001 |
| S100A10 | FOXA1 | -0.47654 | <0.001 | <0.001 |

---
