# Supplementary material for: Identification of Immune-Related Subtypes and Construction of a Novel Prognostic Model for Bladder Urothelial Cancer
Source: MDPI journal article supplement (doi:10.3390/biom12111670), 2022-11-11
Supplement: s1 [file s1]

**Table S2:**

The genes and coefficients used to calculate the risk score for each sample

| Gene    | Coefficient          |
|---------|----------------------|
| CTSS    | -0.207238438969665   |
| S100A7  | 0.0135458074306028   |
| PDGFRB  | 0.0637450037740906   |
| NRP2    | 0.099640691165939    |
| PDGFRA  | 0.116554628802348    |
| S100A10 | 0.000282049731445765 |
| S100A9  | 0.00828914769197644  |
| FABP6   | -0.047309990518725   |
| S100A8  | 0.0386435659526242   |
